# Supplementary material for: Effect of Polyoxymethylene (POM-H Delrin) offgassing within Pandora head sensor on direct sun and multi-axis formaldehyde column measurements in 2016–2019
Source: Copernicus journal article supplement (doi:10.5194/amt-2020-158), 2020-08-03
Supplement: Supplementary file [file amt-2020-158-AC2-supplement.pdf]

**Table 1.** Pandora instruments used in this study

| N   | Owner             | Manufactured | Relevant Hardware Components                                           | Contribution to This Study                                                                                   |
|-----|-------------------|--------------|------------------------------------------------------------------------|--------------------------------------------------------------------------------------------------------------|
| 2   | NASA              | 2011         | upgrade in summer 2019: Nylon parts, temperature sensor, wedged window | Temperature (Section 3); Field study (direct sun, Section 5.1)                                               |
| 21  | NASA              | 2011         | upgrade in 2016: ARC window; POM-H Delrin parts                        | Laboratory tests of HCHO emissions (Section 4)                                                               |
| 32  | NASA              | 2016         | ARC window; POM-H Delrin parts                                         | Field study (direct sun, Section 5.1)                                                                        |
| 46  | NASA              | 2015         | upgrade in 2016 ARC window; POM-H Delrin parts                         | Laboratory tests of HCHO emissions (Section 4)                                                               |
| 108 | ECCC              | 2016         | ARC window; POM-H Delrin parts                                         | Field measurements (Section 2)                                                                               |
| 118 | KNMI              | 2016         | ARC window; POM-H Delrin parts                                         | Laboratory tests of HCHO emissions (Section 4)                                                               |
| 148 | Virginia Tech     | 2018         | temperature sensor (April 2019), wedged window; POM-H Delrin parts     | Temperature (Section 3); Laboratory tests of HCHO emissions (Section 4); Field study (MAX-DOAS, Section 5.2) |
| 155 | Boston University | 2019         | temperature sensor; wedged window; POM-H Delrin parts                  | Temperature (Section 3)                                                                                      |
| 165 | EPA               | summer 2019  | Nylon parts; temperature sensor; wedged window                         | Laboratory tests of HCHO emissions (Section 4)                                                               |
| 167 | EPA               | summer 2019  | Nylon parts; temperature sensor; wedged window                         | Laboratory tests of HCHO emissions (Section 4)                                                               |
| 168 | EPA               | summer 2019  | Nylon parts; temperature sensor; wedged window                         | Laboratory tests of HCHO emissions (Section 4)                                                               |

ECCC: Environment and Climate Change Canada; KNMI: Royal Netherlands Meteorological Institute; EPA: US Environmental Protection Agency; NASA: US National Aeronautics and Space Administration

**Table 2.** History of Pandora hardware changes related to direct sun HCHO measurements

| Period             | Hardware components                                     | Impact on HCHO                                                                                                                                                                                                                   | HCHO Data Used                                                                                           |
|--------------------|---------------------------------------------------------|----------------------------------------------------------------------------------------------------------------------------------------------------------------------------------------------------------------------------------|----------------------------------------------------------------------------------------------------------|
| 2007 - winter 2016 | parallel window, POM-H Delrin                           | window caused etalloning in direct sun measurements, HCHO emissions from POM-H Delrin - <b>direct sun HCHO is not correctable</b>                                                                                                | MAX-DOAS: Pinardi et al., 2013; Direct Sun: Park et. al., 2018                                           |
| spring 2016 - 2017 | anti reflective coating on parallel widow, POM-H Delrin | ARC degrades within 1 year of installation, temperature dependent HCHO internal emission from POM-H Delrin (disagreement between direct sun total column and MAX-DOAS tropospheric column), can be corrected for functioning ARC | MAX-DOAS: Kreher et al., 2020; Direct Sun: Spinei et al., 2018, Herman et al., 2018; Spinei et al., 2020 |
| 2018 - spring 2019 | wedged window*, POM-H Delrin                            | temperature dependent HCHO internal emission from POM-H Delrin (disagreement between direct sun total column and MAX-DOAS tropospheric column), can be corrected                                                                 | MAX-DOAS: Nowak et al. (2020)                                                                            |
| summer 2019-       | wedged widow, nylon                                     | believed not to have any interference caused by design (confirmed by extensive laboratory studies)                                                                                                                               |                                                                                                          |

Note: HCHO from direct sun is not a standard PGN product and was not provided by the NASA and Luftblick PGN groups outside of KORUS-AQ study (Spinei et al., 2018, Herman et al., 2018). Park et al., 2018 performed HCHO analysis independently and were not aware of any PGN discoveries.

\* wedged window are installed on new instruments, if the instruments were not returned to NASA or SciGlob - they are not upgraded, therefore some instruments are probably still have degrading ARC windows
